# Supplementary material
Source: PubMed Central journal article supplement (PMC4862504)
Supplement: AAC.00300-16_zac005165181so1.pdf [file AAC.00300-16_zac005165181so1.pdf]

1 **Supplementary Materials**

2

3 **Characterization of an IncA/C Multidrug Resistance Plasmid in *Vibrio alginolyticus***

4 Lianwei Ye<sup>1,2¶</sup>, Ruichao Li<sup>2,3¶</sup>, Dachuan Lin<sup>2,3</sup>, Yuanjie Zhou<sup>2,3</sup>, Aisi Fu<sup>4</sup>, Qiong Ding<sup>4</sup>,

5 Edward Wai Chi Chan<sup>2,3</sup>, Wen Yao<sup>1\*</sup>, Sheng Chen<sup>2,3\*</sup>

6 <sup>1</sup>College of Animal Science and Technology, Nanjing Agriculture University, Nanjing, P.

7 R. China

8 <sup>2</sup>Shenzhen Key Laboratory for Food Biological Safety Control, Food Safety and

9 Technology Research Centre, The Hong Kong PolyU Shenzhen Research Institute,

10 Shenzhen, P. R. China.

11 <sup>3</sup>State Key Laboratory of Chirosciences, Department of Applied Biology and Chemical

12 Technology, The Hong Kong Polytechnic University, Hung Hom, Kowloon, Hong Kong.

13 <sup>4</sup>Wuhan Institute of Biotechnology, Wuhan, China

14

15

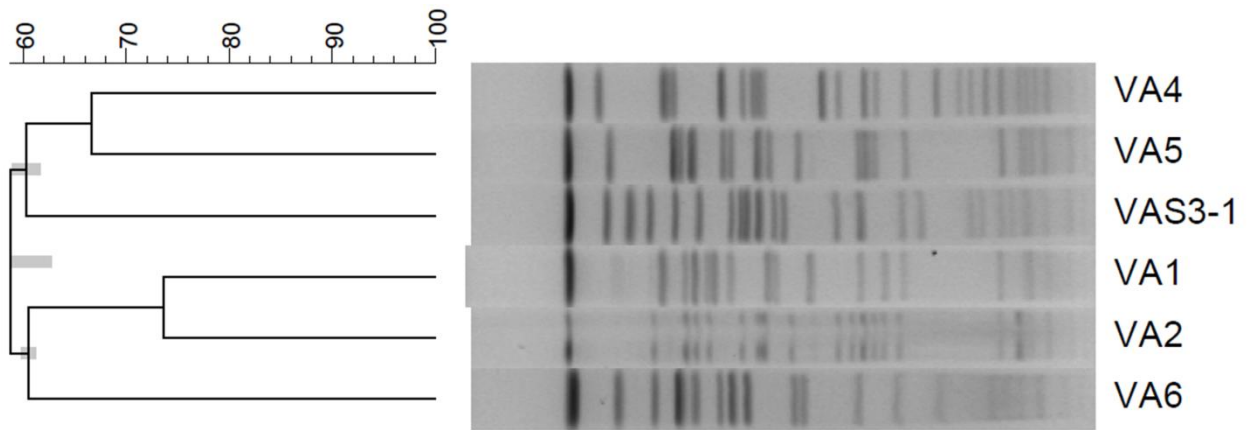

16

17 **Supplementary Figure 1 (SF1). PFGE profiles of the six cephalosporin-resistant *V.***  
18 ***alginolyticus* strains.**

19

20  
21  
22  
23  
24  
25  
26  
27  
28  
29  
30  
31  
32  
33  
34  
35  
36  
37  
38  
39  
40  
41  
42  
43  
44  
45

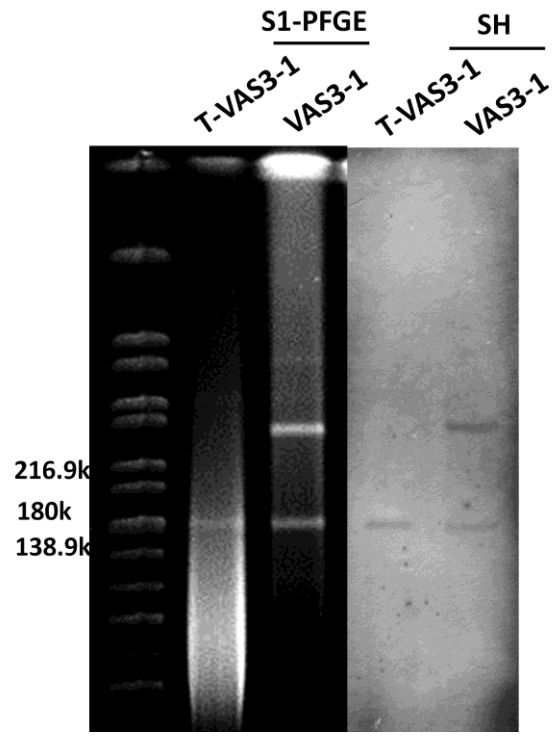

**Supplementary Figure 2 (SF2). S1-PFGE and Southern hybridization of *V. alginolyticus* strain VAS3-1 and the corresponding transconjugant T-VAS3-1.**

46

47

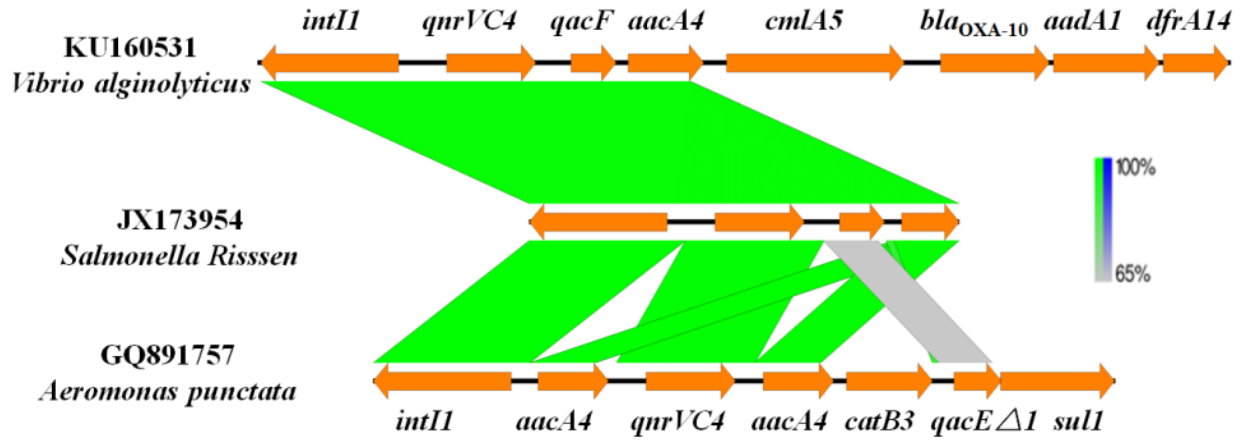

48

49

50 **Supplementary Figure 3 (SF3). Comparative alignment of *qnrVC4* bearing class I**  
51 **integrons in different bacterial species.**

52
